# Supplementary material for: Defaunation affects carbon storage in tropical forests
Source: PubMed Central journal article supplement — Sci Adv. 2015 Dec 18;1(11):e1501105. doi: 10.1126/sciadv.1501105 (PMC4730851; doi:10.1126/sciadv.1501105), 2015-12-18
Supplement: 1501105_SM.pdf [file 1501105_SM.pdf]

## Supplementary Materials for

### **Defaunation affects carbon storage in tropical forests**

Carolina Bello, Mauro Galetti, Marco A. Pizo, Luiz Fernando S. Magnago, Mariana F. Rocha,  
Renato A. F. Lima, Carlos A. Peres, Otso Ovaskainen, Pedro Jordano

Published 18 December 2015, *Sci. Adv.* **1**, e1501105 (2015)

DOI: 10.1126/sciadv.1501105

#### **The PDF file includes:**

- Fig. S1. Distribution function of seed size diameter (mm) dispersed by the major frugivores in the Atlantic forest, Brazil.
  - Fig. S2. Maximum tree height by class of species according to its seed diameter and wood density.
  - Fig. S3. Relationship between wood density and seed diameter by dispersal mode.
  - Fig. S4. Relationships between abiotic variables and magnitude of carbon loss.
  - Fig. S5. Relationships between the compositional variables of each community and its magnitude of carbon loss.
  - Fig. S6. Linear regression of the above-ground biomass (AGB) and the proxy for basal area (BA) times the wood specific gravity (WSG) times maximum height for the different types of forest.
  - Fig. S7. Diagnostic plots of the regression model using basal area (BA) times the wood specific gravity (WSG) times tree maximum height (MaxHeight) as a proxy for AGB.
  - Table S1. Trait information of the 2014 species analyzed (available in the data repository).
  - Table S2. Atlantic Forest communities analyzed, their spatial localization in Brazil, and abiotic characteristics.
  - Table S3. Spearman correlations among dispersal traits and carbon traits.
  - Table S4. *T* test between carbon loss in random scenarios and defaunated scenarios at different intervals of species removed.
  - Table S5. Generalized linear model results showing the influence of abiotic and compositional variables on the magnitude of carbon loss of each community.
  - Table S6. Compositional characteristics of Atlantic Forest communities.
- Supplementary code and data file available at  
[https://github.com/pedroj/MS\\_Carbon](https://github.com/pedroj/MS_Carbon) (DOI:10.5281/zenodo.31880).

Code file S1. Simulation code in R (Simulation\_Code.RMD).

Code file S2. Read me (Simulation\_Code.html).

Data file S1. Trait information of the 2014 species analyzed (Table S1\_Trait Data.xls).

Data file S2. Community data example for the simulation code (prove\_community.csv).

References (188–214)

## Figures

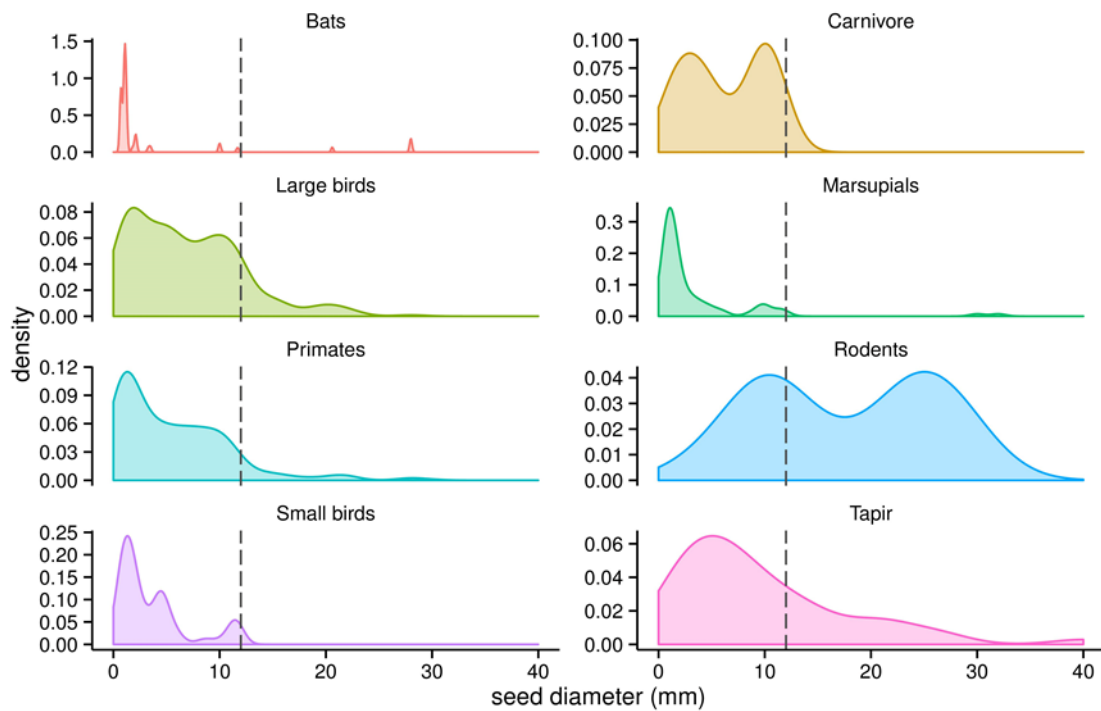

**Figure S1. Distribution function of seed size diameter (mm) dispersed by the major frugivores in the Atlantic forest, Brazil.** Small birds that are not game species have a maximum peak of dispersed seeds near to 12 mm of diameter indicated by the vertical dashed line. The dataset is based on published information on frugivores diet and plant dispersal assemblage from studies in the Brazilian Atlantic forest.

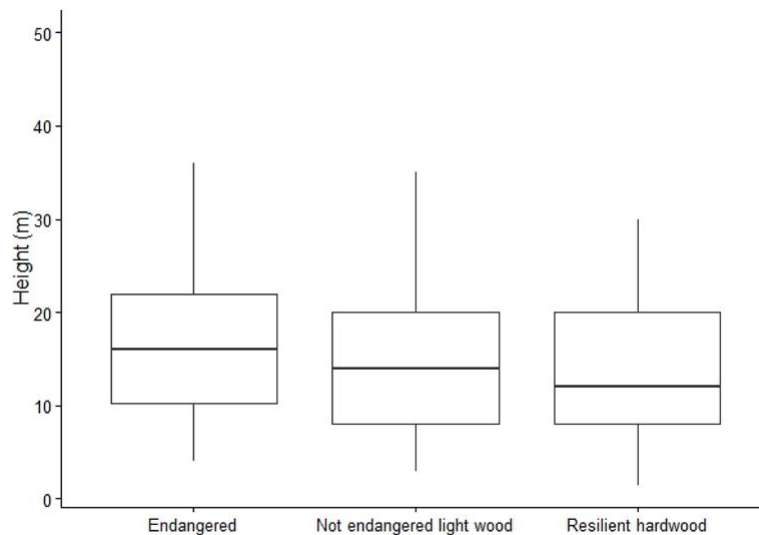

**Figure S2. Maximum tree height by class of species according to seed diameter and wood density.** Endangered are species with seed diameter  $\geq 12$  mm; Resilient hardwood are species with seed diameter  $< 12$  mm and dense wood ( $> 0.7 \text{ g cm}^{-3}$ ); Not endangered light wood are species with seed diameter  $< 12$  mm and light wood ( $< 0.7 \text{ g cm}^{-3}$ ).

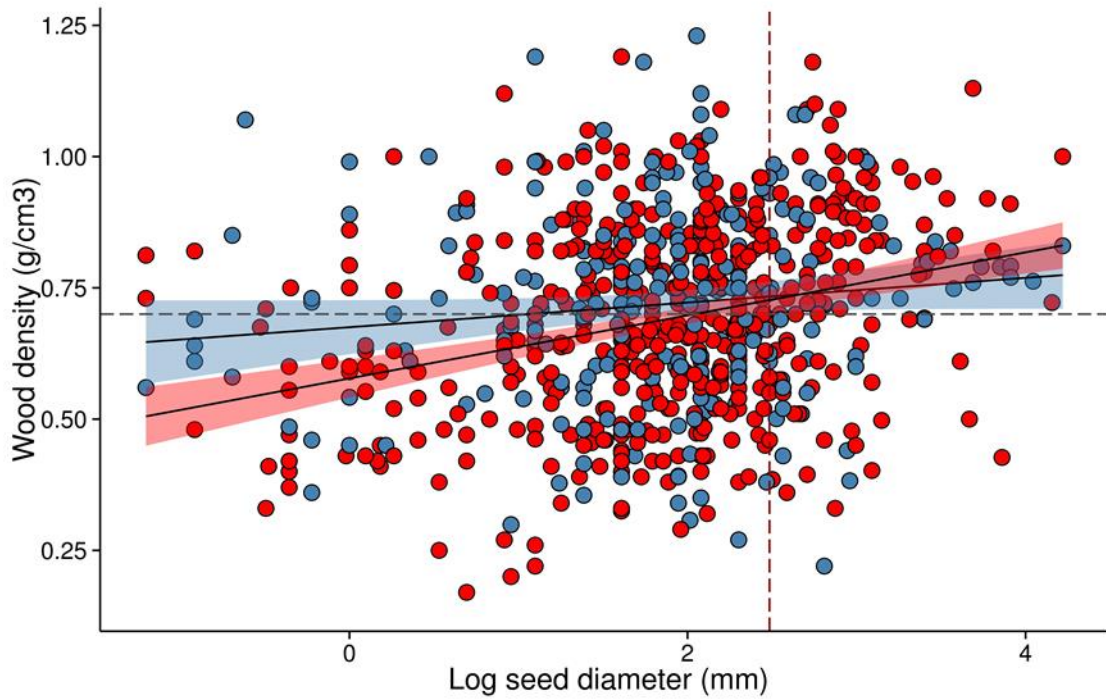

**Figure S3. Relationship between wood density and seed diameter by dispersal syndrome.** Animal-dispersed (red) and abiotically dispersed (blue) trees in the Brazilian Atlantic forest. Abiotic correlation ( $r_s = 0.11$ ,  $p = 0.06$ ,  $N = 246$ ). Zoochoric correlation ( $r_s = 0.28$ ,  $p < 0.001$ ,  $N = 486$ ). Red vertical line shows the seed diameter threshold of 12 mm. Black horizontal dashed line indicates the mean wood density of the whole dataset.

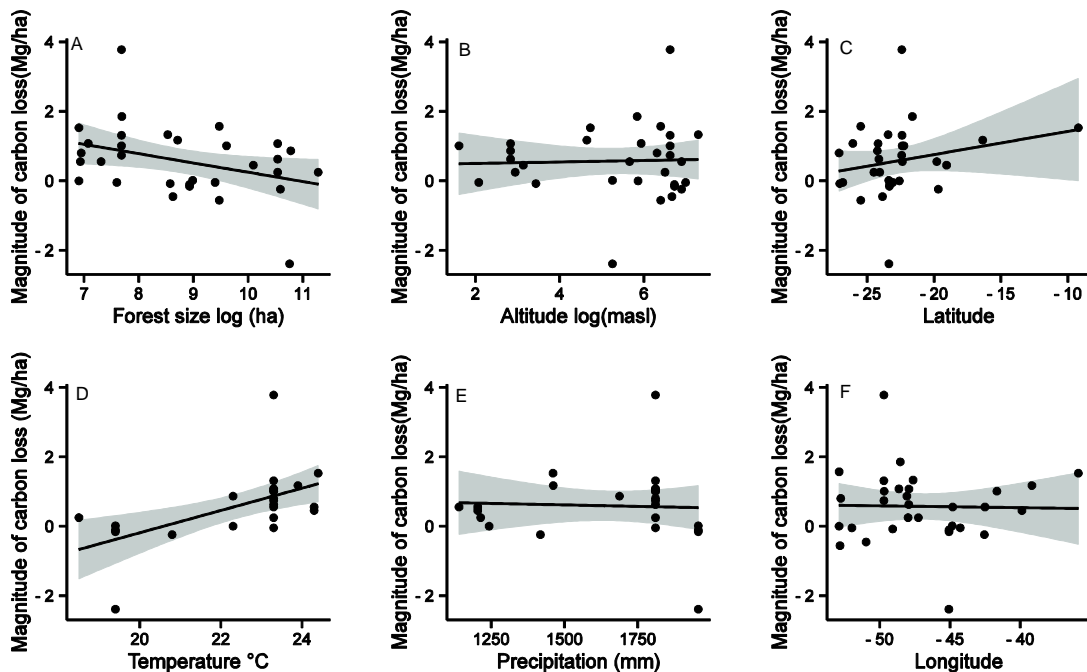

**Figure S4. Relationships between abiotic variables and magnitude of carbon loss.** A) Forest size, B) Altitude, C) Latitude, D) Temperature, E) Precipitation, F) Longitude. Gray line shows the tendency of the glm fitting model and the confidence interval

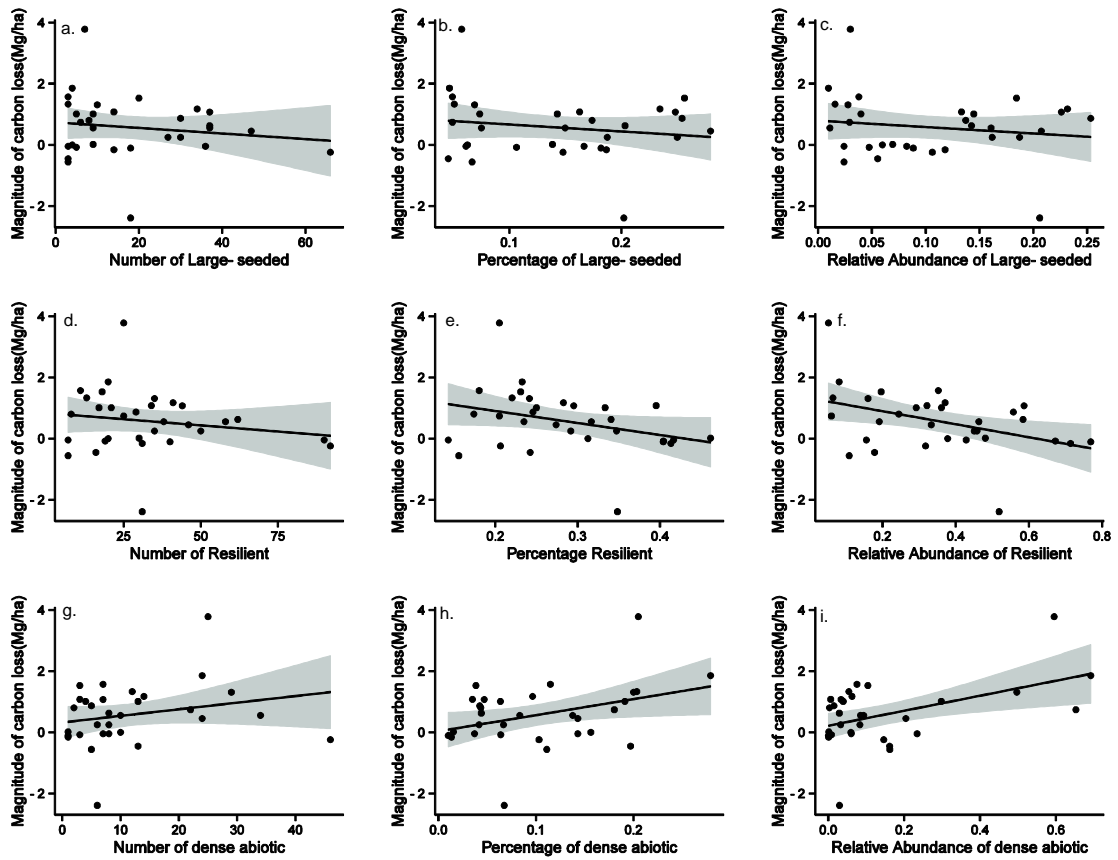

**Figure S5. Relationships between the compositional variables of each community and its magnitude of carbon loss.** A) Number of large-seeded species (seed size  $\geq 12$  mm), B) Percentage of large-seeded species, C) Relative Abundance of large-seeded species, D) Number of Resilient species (seed size  $< 12$  mm and wood density  $> 0.7$   $\text{mg}\cdot\text{cm}^{-3}$ ), E) Percentage of Resilient species, F) Relative Abundance of Resilient species, G) Number of dense abiotic species (Species with abiotic disperse syndrome and wood density  $> 0.7$   $\text{mg}\cdot\text{cm}^{-3}$ ), H) Percentage of dense abiotic species, I) Relative Abundance of dense abiotic species. Gray line shows the tendency of the glm fitting model and the confidence interval.

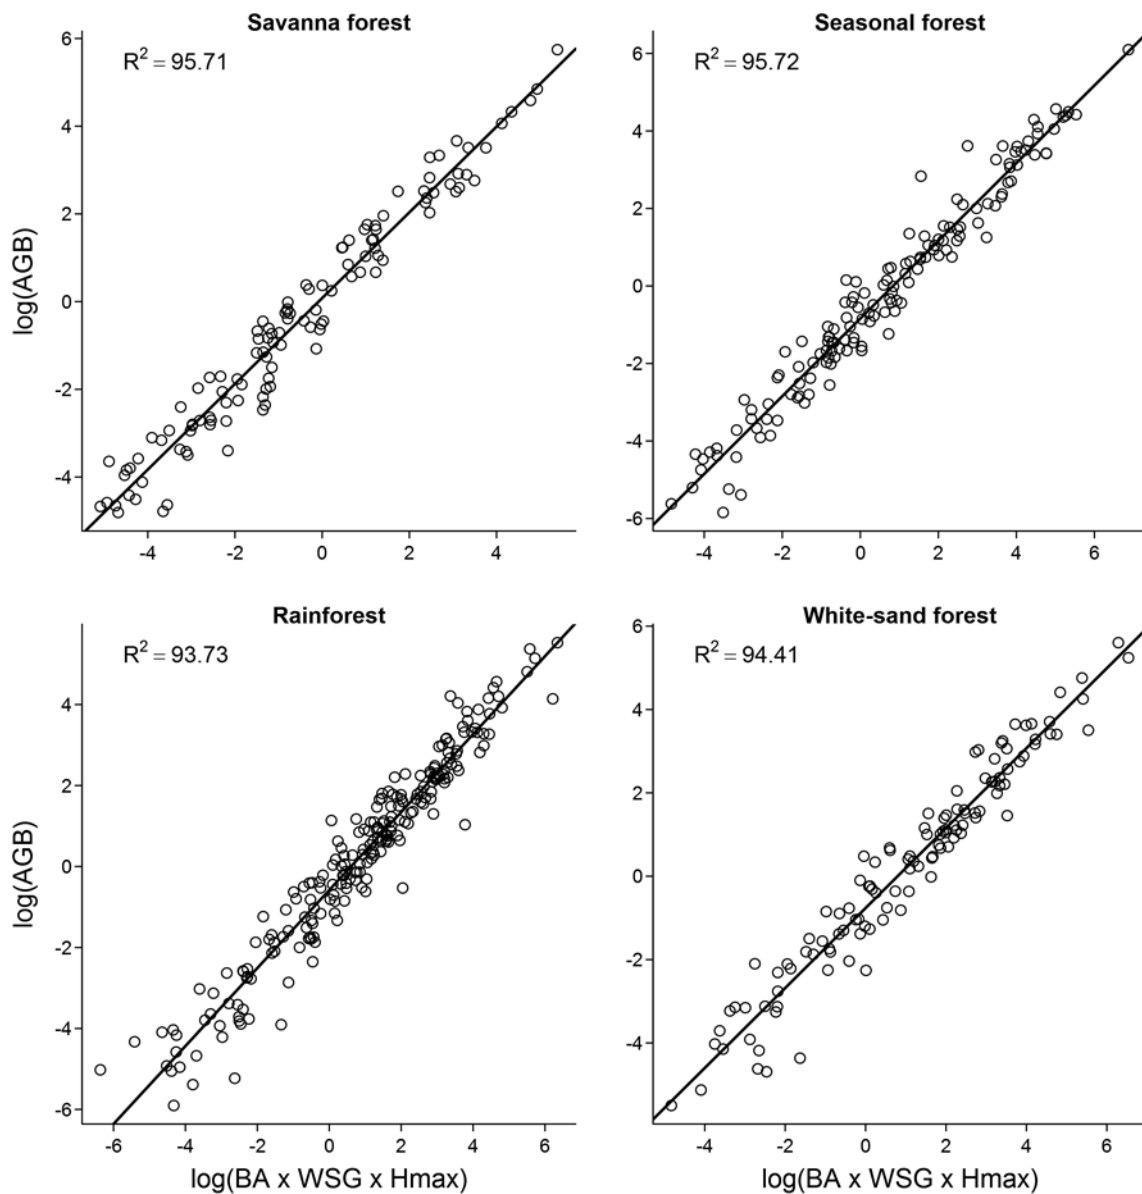

**Figure S6. Linear regression of the above-ground biomass (AGB) and the proxy of basal area (BA) times the wood specific gravity (WSG) times maximum height for the different types of forest.** Each circle represents the values of AGB and  $\text{BA} \times \text{WSG} \times \text{MaxHeight}$  estimated for each species at each site. The trend line is the result of the linear regression model. It is presented with the value of the adjusted- $R^2$ .

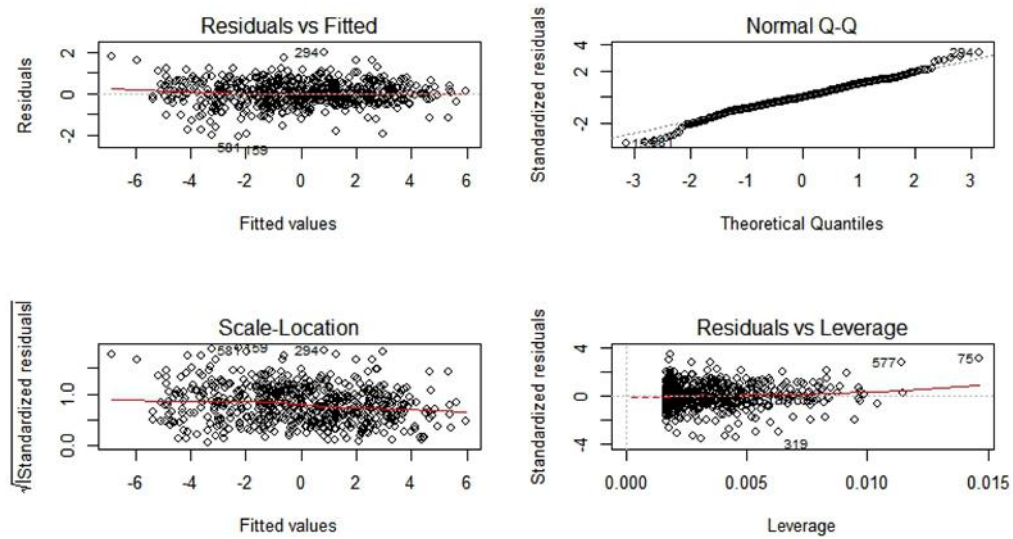

**Figure S7. Diagnostic plots of the regression model using basal area (BA) times the wood specific gravity (WSG) times tree maximum height (MaxHeight) as a proxy of AGB.** a) Residual vs. fitness, b) Normal distribution of the residuals, c) Scale Location of the standardized residuals, d) Leverage distance. In red is showed the trend line of the residuals.

## Tables

**Table S1. Traits information of the 2014 species analyzed.** Available in file “Table 1S\_Trait Data.xls”. Seed\_type= type of seed related to desiccation. sind=Dispersion syndrome , fdiam=fruit diameter(mm), flen=fruit length (mm), seeddiam= seed diameter (mm), seedlen= seed length (mm), wooden=wood density ( $\text{g/cm}^3$ ), tre.size.max= max height reached by the species (m).

**Table S2. Atlantic Forest Communities analyzed, their spatial localization in Brazil, and abiotic characteristics.** Site code= short name of each community. State= Brazilian states. County= Brazilian counties. Latitude and Longitude in decimal degrees. Altitude (masl). Temp= annual mean temperature in °C. PP=Annual precipitation in (mm). Plot=Plot size in hectares. Forest= Forest size in hectares. Reference= Reference of phytosociological data of each community.

| Site Code | State | County                 | Locality                                | Latitude | Longitude | Altitude (masl) | Temp (°C) | PP (mm /year) | Plot (ha) | Forest (ha) | Refe  |
|-----------|-------|------------------------|-----------------------------------------|----------|-----------|-----------------|-----------|---------------|-----------|-------------|-------|
| Almuri    | Al    | Murici                 | EEc de Murici                           | -9.21444 | -35.8706  | 588             | 21.2      | 1778          | 1.05      | 2634        | (188) |
| BAcabra   | BA    | Santa Cruz de Cabrália | RPPN Estação Veracel                    | -16.3658 | -39.1767  | 104             | 23.9      | 1471          | 1.2       | 8820        | (189) |
| ESsoor    | ES    | Linhares               | REBIO de Sooretama                      | -19.064  | -39.885   | 52              | 24.0      | 1227          | 1         | 17707       | (190) |
| MGitamo1  | MG    | Itamonte               | APA Serra da Mantiqueira                | -22.3653 | -44.8089  | 1652            | 14.5      | 1889          | 2.4       | 7384        | (191) |
| MGperd1   | MG    | Dionísio               | Zona de Amortecimento do PE do Rio Doce | -19.7983 | -42.5139  | 298             | 23.3      | 1135          | 1.2       | 1500        | (192) |
| MGperd11  | MG    | Timóteo                | Frag 099                                | -19.6849 | -42.5543  | 307             | 23.4      | 1150          | 6         | 34126       | (193) |
| PRdiam3   | PR    | Diamante do Norte      | EEc de Caiu                             | -22.592  | -52.889   | 268             | 22.8      | 1233          | 1.08      | 1435        | (194) |
| PRquedas2 | PR    | Quedas do Iguaçu       | Faz Rio das Cobras                      | -25.4833 | -52.8833  | 544             | 18.3      | 1784          | 1.63      | 4336        | (195) |
| PRquedas3 | PR    | Quedas do Iguaçu       | Faz Rio das Cobras                      | -25.477  | -52.824   | 654             | 18.0      | 1795          | 1.63      | 4336        | (195) |
| PRtama1   | PR    | Tamarana               | TI Apucarantina                         | -23.852  | -50.967   | 608             | 19.4      | 1450          | 1         | 4100        | (196) |
| RJpeig2   | RJ    | Angra dos Reis         | PE Ilha Grande                          | -23.091  | -44.27    | 500             | 21.6      | 1451          | 1.02      | 15909       | (197) |
| RJpnrij   | RJ    | Carapebas              | PARNA da Restinga de Jurubatiba         | -22.25   | -41.6667  | 10              | 23.0      | 1112          | 1.44      | 3629        | (198) |
| SCblum1b  | SC    | Blumenau               | Parque Natural das Nascentes            | -27.048  | -49.078   | 578             | 17.7      | 1663          | 1         | 273111      | (199) |
| SCguat    | SC    | Guatambu/Chapecá       | FLONA de Chapecá                        | -27.098  | -52.77    | 550             | 19.4      | 1960          | 1.56      | 1266        | (200) |
| SCponte   | SC    | Ponte Serrada          |                                         | -26.8211 | -51.9792  | 1037            | 16.0      | 2054          | 1.56      | 3239        | (200) |
| SCvolta   | SC    | Itapoã                 | Reserva de Volta Velha                  | -26.0667 | -48.6333  | 11              | 21.2      | 1888          | 1         | 10910       | (201) |
| SPeec1    | SP    | Gália                  | EEc de Caetetus                         | -22.4112 | -49.7011  | 577             | 20.7      | 1281          | 10.24     | 3331        | (202) |



|          |    |                        |                                               |          |          |      |      |      |       |        |       |
|----------|----|------------------------|-----------------------------------------------|----------|----------|------|------|------|-------|--------|-------|
| SPeec2   | SP | Gália                  | EEc de Caetetus                               | -22.4182 | -49.7015 | 543  | 20.8 | 1278 | 5.76  | 3331   | (203) |
| SPeec3   | SP | Gália                  | EEc de Caetetus                               | -22.3944 | -49.7083 | 610  | 20.1 | 1301 | 5.76  | 3331   | (204) |
| SPeec4   | SP | Gália                  | EEc de Caetetus                               | -22.3818 | -49.6834 | 680  | 20.0 | 1305 | 1     | 3331   | (205) |
| SPigua1  | SP | Iguape                 | EEc de Itatins                                | -24.5    | -47.25   | 17   | 22.0 | 1905 | 1     | 5675   | (206) |
| SPiper2  | SP | Iperó <sup>3</sup>     | FLONA de Ipanema                              | -23.4333 | -47.625  | 733  | 18.8 | 1202 | 1.12  | 2379   | (207) |
| SPmatao2 | SP | Matão                  | Faz Boa Vista                                 | -21.6206 | -48.5372 | 589  | 21.4 | 1316 | 1     | 2353   | (208) |
| SPpecb1  | SP | Sete Barras            | PE Carlos Botelho                             | -24.1814 | -47.925  | 347  | 19.4 | 1546 | 10.24 | 457617 | (202) |
| SPpecb2  | SP | Sete Barras            | PE Carlos Botelho                             | -24.125  | -47.9351 | 526  | 18.2 | 1451 | 5.76  | 457617 | (209) |
| SPpecb3  | SP | São Miguel Arcanjo     | PE Carlos Botelho                             | -24.0604 | -47.9833 | 789  | 17.4 | 1386 | 5.76  | 457617 | (210) |
| SPpei1   | SP | Sete Barras            | PE de Intervalos                              | -24.2333 | -48.0667 | 64   | 22.0 | 1613 | 1.98  | 457617 | (211) |
| SPpesm6  | SP | Ubatuba                | PE da Serra do Mar<br>(Núcleo Picinguaba)     | -23.3817 | -44.8401 | 1    | 23.3 | 2428 | 1     | 1428   | (212) |
| SPpesmG  | SP | Ubatuba                | PE da Serra do Mar<br>(Núcleo Picinguaba)     | -23.3739 | -45.0808 | 364  | 20.8 | 2397 | 1     | 85326  | (213) |
| SPpesmK  | SP | São Luiz do Paraitinga | PE da Serra do Mar<br>(Núcleo Santa Virginia) | -23.3253 | -45.0686 | 1030 | 16.5 | 1734 | 1     | 85326  | (214) |
| SPpesmN  | SP | São Luiz do Paraitinga | PE da Serra do Mar<br>(Núcleo Santa Virginia) | -23.3433 | -45.0728 | 1052 | 16.2 | 1760 | 1     | 85326  | (214) |

**Table S3. Spearman correlations among dispersal traits and carbon traits.** In parenthesis p-values and number of species involved (N). Upper diagonal shows correlation for the whole database. Below the diagonal, correlations for the animal-dispersed species.

|                            | <b>Seed diam (log)</b> | <b>Seed length (log)</b> | <b>Wood density</b>    | <b>Tree size max (log)</b> | <b>Fruit diam (log)</b>  | <b>Fruit length (log)</b> |
|----------------------------|------------------------|--------------------------|------------------------|----------------------------|--------------------------|---------------------------|
| <b>Seed diameter (log)</b> |                        | 0.85<br>(<0.001, N 1053) | 0.22<br>(<0.001 N 732) | 0.21<br>(<0.001 N 1087)    | 0.59<br>(<0.001 N 1083)  | 0.50<br>(<0.001 N 1057)   |
| <b>Seed length (log)</b>   | 0.90<br>(<0.001 N 743) |                          | 0.21<br>(0.001 N 721)  | 0.24<br>(<0.001 N 1013)    | 0.54<br>(<0.001 N 983)   | 0.59<br>(<0.001 N 950)    |
| <b>Wood density</b>        | 0.28<br>(<0.001 N 486) | 0.23<br>(0.001 N 473)    |                        | -0.0003<br>(0.96 N 833)    | 0.15<br>(<0.001 N 818)   | 0.13<br>(<0.001 N 802)    |
| <b>Tree size max (log)</b> | 0.25<br>(<0.001 N 783) | 0.26<br>(<0.001 N 705)   | -0.06<br>(0.17 N 557)  |                            | 0.079<br>(<0.001 N 1156) | 0.19<br>(<0.001 N1290)    |
| <b>Fruit diam (log)</b>    | 0.60<br>(<0.001 N 811) | 0.57<br>(<0.001 N 710)   | 0.15<br>(<0.001 N 586) | 0.26<br>(<0.001 N 958)     |                          | 0.76<br>(<0.001 N 1496)   |
| <b>Fruit length (log)</b>  | 0.58<br>(<0.001 N 787) | 0.62<br>(<0.001 N 677)   | 0.08<br>(0.03 N 570)   | 0.29<br>(<0.001 N 1014)    | 0.77<br>(<0.001 N 1218)  |                           |

**Table S4. T test between carbon loss in random scenarios and defaunated scenarios at different intervals of species removed.** All values significant at the Bonferroni-corrected p level.

| <b>% of species removed</b> | <b>t test</b> | <b>P value</b> |
|-----------------------------|---------------|----------------|
| <b>10</b>                   | 3.549         | 0.0009         |
| <b>20</b>                   | 3.443         | 0.0012         |
| <b>30</b>                   | 3.346         | 0.0016         |
| <b>40</b>                   | 3.484         | 0.0011         |
| <b>50</b>                   | 3.296         | 0.0019         |
| <b>60</b>                   | 3.353         | 0.0016         |
| <b>70</b>                   | 3.388         | 0.0015         |
| <b>80</b>                   | 3.233         | 0.0024         |
| <b>90</b>                   | 3.237         | 0.0023         |
| <b>100</b>                  | 3.134         | 0.0031         |

**Table S5. Generalized linear models results showing the influence of abiotic and compositional variables on the magnitude of carbon loss of each community.**

Percentage endanger = Number of species with seed size > 12 mm / Number of species ,  
 Quantity endanger= Number of species with seed size > 12 mm, Percentage endanger  
 IND = Number of individuals of species with seed size > 12 mm / Number of  
 individuals , Percentage Resilient Hardwood = Number of species with seed size  
 < 12 mm and wood density>0.7 mg/cm<sup>3</sup>/ Number of species , Quantity Resilient  
 Hardwood= Number of species with seed size < 12 mm and wood density>0.7 mg/cm<sup>3</sup>.  
 Percentage Resilient Hardwood IND= Number of individuals of species with seed  
 size < 12 mm and wood density>0.7 mg/cm<sup>3</sup>/ Number of individuals Percentage  
 abiowood= Number of abiotic species with wood density>0.7 mg/cm<sup>3</sup> / Number of  
 species, Quantity abiowood= Number of abiotic species with wood density>0.7  
 mg/cm<sup>3</sup>, Percentage abiowood IND= Number individuals of abiotic species with wood  
 density>0.7 mg/cm<sup>3</sup> / Number of species

|                                      | <b>Coefficient</b> | <b>p</b> | <b>Pseudo<br/>R<sup>2</sup></b> |
|--------------------------------------|--------------------|----------|---------------------------------|
| Temperature                          | 0.30               | 0.03     | 0.19                            |
| Percentage Resilient<br>Hardwood IND | -2.08              | 0.01     | 0.17                            |
| Forest Size                          | -0.14              | 0.12     | 0.07                            |
| Quantity Danger                      | -0.02              | 0.19     | 0.05                            |
| Percentage Danger                    | -2.65              | 0.26     | 0.04                            |
| Percentage Data                      | -1.49              | 0.28     | 0.03                            |
| Quantity Resilient<br>Hardwood       | -0.01              | 0.38     | 0.02                            |
| Longitude                            | 0.04               | 0.39     | 0.02                            |
| Percentage Danger IND                | -1.99              | 0.40     | 0.02                            |
| Percentage Resilient<br>Hardwood     | -1.20              | 0.51     | 0.01                            |
| Latitude                             | 0.03               | 0.51     | 0.01                            |
| Percentage Abiowood<br>IND           | 0.45               | 0.56     | 0.01                            |
| Precipitation                        | 0.00               | 0.71     | 0.01                            |
| Altitude                             | 0.00               | 0.76     | 0.00                            |
| Quantity Abiowood                    | 0.00               | 0.77     | 0.00                            |
| Percentage Abiowood                  | 0.26               | 0.88     | 0.00                            |

**Table S6. Compositional characteristics of Atlantic Forest Communities.** Site code= short name of each community. Percentage endanger = Number of species with seed size > 12 mm / Number of species , Quantity endanger= Number of species with seed size > 12 mm, Percentage endanger IND = Number of individuals of species with seed size > 12 mm / Number of individuals , Percentage Resilient Hardwood = Number of species with seed size < 12 mm and wood density>0.7 mg/cm<sup>3</sup>/ Number of species , Quantity Resilient Hardwood= Number of species with seed size < 12 mm and wood density>0.7 mg/cm<sup>3</sup>, Percentage Resilient Hardwood IND= Number of individuals of species with seed size < 12 mm and wood density>0.7 mg/cm<sup>3</sup>/ Number of individuals Percentage Abiowood= Number of abiotic species with wood density>0.7 mg/cm<sup>3</sup> / Number of species, Quantity Abiowood= Number of abiotic species with wood density>0.7 mg/cm<sup>3</sup>, Percentage Abiowood IND= Number individuals of abiotic species with wood density>0.7 mg/cm<sup>3</sup> / Number of species

| Site Code | Quantity Endanger | Percentage Endanger | Percentage Endanger IND | Quantity Resilient Hardwood | Percentage Resilient Hardwood | Percentage Resilient Hardwood IND | Quantity Abiowood | Percentage Abiowood | Percentage Abiowood IND |
|-----------|-------------------|---------------------|-------------------------|-----------------------------|-------------------------------|-----------------------------------|-------------------|---------------------|-------------------------|
| Almuri    | 20                | 26%                 | 18%                     | 18                          | 23%                           | 20%                               | 3                 | 4%                  | 10%                     |
| BAcabra   | 34                | 23%                 | 23%                     | 41                          | 28%                           | 37%                               | 14                | 10%                 | 6%                      |
| ESsoor    | 47                | 28%                 | 21%                     | 46                          | 27%                           | 33%                               | 24                | 14%                 | 20%                     |
| MGitamo1  | 9                 | 8%                  | 1%                      | 38                          | 32%                           | 46%                               | 10                | 8%                  | 9%                      |
| MGperd1   | 37                | 15%                 | 16%                     | 58                          | 23%                           | 19%                               | 34                | 14%                 | 9%                      |
| MGperd11  | 66                | 15%                 | 11%                     | 92                          | 21%                           | 32%                               | 46                | 10%                 | 15%                     |
| PRdiam3   | 4                 | 6%                  | 6%                      | 20                          | 31%                           | 38%                               | 10                | 16%                 | 6%                      |
| PRquedas2 | 3                 | 5%                  | 4%                      | 11                          | 18%                           | 35%                               | 7                 | 11%                 | 8%                      |
| PRquedas3 | 3                 | 7%                  | 2%                      | 7                           | 16%                           | 11%                               | 5                 | 11%                 | 16%                     |
| PRtama1   | 3                 | 5%                  | 6%                      | 16                          | 24%                           | 18%                               | 13                | 20%                 | 16%                     |
| RJpeig2   | 36                | 17%                 | 8%                      | 90                          | 42%                           | 43%                               | 8                 | 4%                  | 6%                      |
| RJpnrj    | 9                 | 14%                 | 14%                     | 21                          | 33%                           | 36%                               | 4                 | 6%                  | 4%                      |
| SCblum1b  | 5                 | 11%                 | 5%                      | 19                          | 40%                           | 67%                               | 3                 | 6%                  | 1%                      |
| SCguat    | 8                 | 17%                 | 14%                     | 8                           | 17%                           | 24%                               | 2                 | 4%                  | 0%                      |

|          |    |     |     |    |     |     |    |     |     |
|----------|----|-----|-----|----|-----|-----|----|-----|-----|
| SCponte  | 3  | 6%  | 2%  | 7  | 14% | 16% | 7  | 14% | 23% |
| SCvolta  | 14 | 16% | 13% | 34 | 40% | 32% | 3  | 3%  | 1%  |
| SPeec1   | 7  | 6%  | 3%  | 25 | 20% | 5%  | 25 | 20% | 60% |
| SPeec2   | 6  | 5%  | 3%  | 25 | 20% | 6%  | 22 | 18% | 65% |
| SPeec3   | 10 | 7%  | 3%  | 35 | 24% | 16% | 29 | 20% | 50% |
| SPeec4   | 5  | 7%  | 4%  | 17 | 25% | 29% | 13 | 19% | 30% |
| SPigua1  | 30 | 25% | 16% | 35 | 29% | 45% | 8  | 7%  | 8%  |
| SPiper2  | 3  | 5%  | 2%  | 13 | 22% | 6%  | 12 | 20% | 5%  |
| SPmatao2 | 4  | 5%  | 1%  | 20 | 23% | 8%  | 24 | 28% | 69% |
| SPpecb1  | 37 | 25% | 23% | 44 | 30% | 59% | 7  | 5%  | 3%  |
| SPpecb2  | 37 | 20% | 14% | 62 | 34% | 58% | 8  | 4%  | 3%  |
| SPpecb3  | 27 | 19% | 19% | 50 | 35% | 46% | 6  | 4%  | 3%  |
| SPpei1   | 30 | 25% | 25% | 29 | 25% | 56% | 5  | 4%  | 2%  |
| SPpesm6  | 9  | 14% | 7%  | 30 | 46% | 48% | 1  | 2%  | 0%  |
| SPpesmG  | 18 | 20% | 21% | 31 | 35% | 52% | 6  | 7%  | 3%  |
| SPpesmK  | 18 | 18% | 9%  | 40 | 40% | 77% | 1  | 1%  | 0%  |
| SPpesmN  | 14 | 19% | 12% | 31 | 41% | 71% | 1  | 1%  | 0%  |
